# Supplementary material
Source: publisher figshare collection journal article supplement (https://gsajournals.figshare.com/articles/dataset/_/6133217)
Supplement: Supplementary file 1 [file 1]

**Table S1. Oligos used for plasmid construction**

| Usage   | Oligo | Sequence (5'-3')                                  | Length<br>(bp) |
|---------|-------|---------------------------------------------------|----------------|
| pDB4280 | P127  | TACT <i>gcggccgc</i> TTCTTCGGTACAGGTTATGTTTTTTGGC | 40             |
|         | P128  | AGAA <i>gcggccgc</i> AGTAGCCAAAGAGCCTTTGGAAGACA   | 40             |
| pDB4279 | P123  | ATGTCCGAGTGGTTAAGGAGTTAGACTCGCCATCGATGG           | 59             |
|         |       | ACATGGAGGCCCAAGTACC                               |                |
|         | P124  | TCTGTGCGGTATTTACACCGCATACCATCGCGATGCAGT           | 59             |
|         |       | ATAGCGACCAGCATTACACA                              |                |
| pDB4281 | P129  | CGGA <i>gcggccgc</i> TTCTTCGGTACAGGTTATGTTTTTTGGC | 40             |
|         | P130  | AGAA <i>gcggccgc</i> TCCGCAGGGGCTCAAGATGCCCCTGTTC | 40             |
| pDB4282 | P75   | CATCTGGTGTGTACAAAATTG                             | 21             |
| pDB4283 | P131  | GGCCGCATCTTCACTGGTGTC                             | 25             |
|         | P82   | <i>Agcggccgc</i> GTTTTAGAGCTAGAAATAGCAAGTTA       | 35             |
| pDB4284 | P83   | TGTGGAATTGTGAGCGGATA                              | 20             |
|         | P84   | CGAGGATTTTCGACCAGGATA                             | 20             |
|         | P85   | TTAGCCTTCTTGTGAAAACGTTTTAGAGCTAGAAATAGC           | 40             |
|         | P86   | GTTTTCCACAAGAAGGCTAATTCTTCGGTACAGGTTATG           | 39             |

NotI sites are shown in italic.
