# Supplementary material
Source: publisher figshare collection journal article supplement (https://gsajournals.figshare.com/articles/dataset/_/6133217)
Supplement: Supplementary file 3 [file 1]

**Table S2. Oligos used as donors or as primers for donor amplification**

| Oligo                      | Sequence (5'-3')                         | Length<br>(bp) |
|----------------------------|------------------------------------------|----------------|
| <i>rpl42</i> -90-sense     | CGTTATGACCGCAAGCAAAGTGGTTTTGGTGGTCAAA    | 90             |
|                            | CTAAGCaaGTgTTCCACAAGAAGGCTAAGGTTACCAAG   |                |
|                            | AAGGTTGTCCTTCGT                          |                |
| <i>rpl42</i> -90-antisense | ACGAAGGACAACCTTCTTGGTAACCTTAGCCTTCTTGT   | 90             |
|                            | GGAACaCttGCTTAGTTTGACCACCAAAACCACTTTGCT  |                |
|                            | TGCGGTCATAACG                            |                |
| <i>tor2</i> -sense         | TATCCAGTGATTCCTTTATCACCGGATTCAGGaCTTTTA  | 90             |
|                            | GGCTGGGTTTTaGATAGCGATACTTcGCATGTCTTAATT  |                |
|                            | CGTGACTACAGA                             |                |
| <i>tor2</i> -antisense     | TCTGTAGTCACGAATTAAGACATGCgAAGTATCGCTAT   | 90             |
|                            | CtAAAACCCAGCCTAAAAGtCCTGAATCCGGTGATAAA   |                |
|                            | GGAATCACTGGATA                           |                |
| <i>cdc25</i> -sense        | CTTCATGGTGGTTACAAGTCGTTTTACGAAAAtCACAA   | 90             |
|                            | AAAAtCGTTaTGACCCAATTAACCTACGTTCCGATGAACG |                |
|                            | ATGCTTCGCATGTT                           |                |
| <i>cdc25</i> -antisense    | AACATGCGAAGCATCGTTCATCGGAACGTAGTTAATT    | 90             |
|                            | GGGTCAtAACGaTTTTTGTGaTTTTCGTAAAACGACTTG  |                |
|                            | TAACCACCATGAAG                           |                |
| <i>mat1</i> -top           | TAAATGTATAGTCTTTCTCCTTTGTTTTCTCTCGTTCGT  | 90             |
|                            | TTCCATATTATACTTTCACTACATCTCATTACTCATTCC  |                |
|                            | TACCATACACAC                             |                |
| <i>mat1</i> -bottom        | GTGTGTATGGTAGGAATGAGTAATGAGATGTAGTGAA    | 90             |
|                            | AGTATAATATGGAAACGAACGAGAGAAAACAAAGGA     |                |
|                            | GAAAGACTATACATTTA                        |                |

|                        |                                                                                          |    |
|------------------------|------------------------------------------------------------------------------------------|----|
| <i>ypt7</i> -a-up-F    | GTTTCGTTATACTCATGACGTGAAAGG                                                              | 54 |
| <i>ypt7</i> -a-up-ov-R | <i>agtgaaaagttctctcctttactcat</i> ATTTACAGCGTAAAAACGAGA<br>TAATTC                        | 54 |
| <i>ypt7</i> -a-dn-ov-F | <i>cacatggcatggatgaactatacaaaa</i> ATGGCGGCAAAAAGAAGCAT<br>TTGCTG                        | 53 |
| <i>ypt7</i> -a-dn-R    | CTCCTATGGTTGCTTTATAATCTTTGCT                                                             | 54 |
| <i>ypt7</i> -b-up-F    | AAGTAATTTATAAAATTTATTTTTTTTGCAGATCTCAA<br>AA                                             | 40 |
| <i>ypt7</i> -b-dn-R    | CATATTTCAAAAAACATACCTGATTCATG                                                            | 35 |
| <i>ypt7</i> -c-up-F    | CTATTGGCCTTCAATAATATATCGAATTATCTCGTTTTT<br><i>ACGCTGTAAATatgagtaaaggagaagaacttttact</i>  | 77 |
| <i>ypt7</i> -c-dn-R    | CTTTCTCCTAAAAATAAATACTTTCAGCAAATGCTTCTT<br><i>TTTGCCGGCCATtttgtatagttcatccatgccatgtg</i> | 76 |

The altered nucleotides in knock-in donors are in lowercase. The sequences in mECitrine are shown in italic. The *ypt7* donor-a was obtained via overlap PCR, using genomic DNA as template for the first round of PCR and mECitrine-encoding DNA as template for the second round of PCR; *ypt7* donor-b was amplified using *ypt7* donor-a as template; and *ypt7* donor c was amplified using mECitrine-encoding DNA as template.
