# Supplementary material
Source: publisher figshare collection journal article supplement (https://gsajournals.figshare.com/articles/dataset/_/6133217)
Supplement: Supplementary file 4 [file 1]

**A**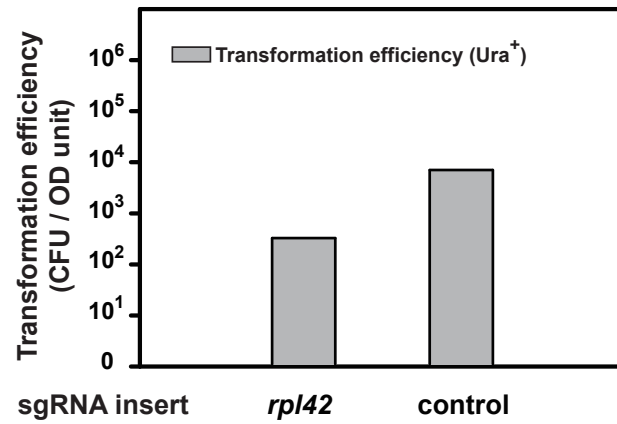**B**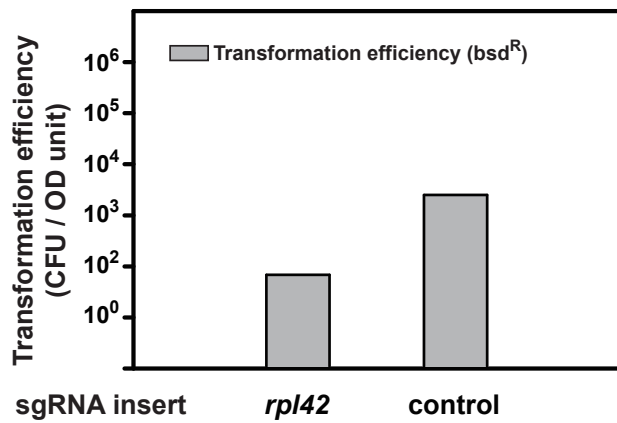

**Figure S1. A donor-free transformation using a gene-targeting sgRNA insert resulted in a substantially lower transformation efficiency than a control transformation using a control sgRNA insert.**

A. Quantitation of the transformation efficiencies of a representative experiment using the split-*ura4* system. 30 ng of the gapped plasmid and 200 ng of the *rpl42* sgRNA insert or the control insert were used. Transformation efficiencies were expressed as colony forming units (CFU) per OD600 unit of cells.

B. Quantitation of the transformation efficiencies of a representative experiment using the split-*bsdMX* system. 30 ng of the gapped plasmid and 200 ng of the *rpl42* sgRNA insert or the control insert were used.
