# Supplementary material
Source: publisher figshare collection journal article supplement (https://gsajournals.figshare.com/articles/dataset/_/6133217)
Supplement: Supplementary file 5 [file 1]

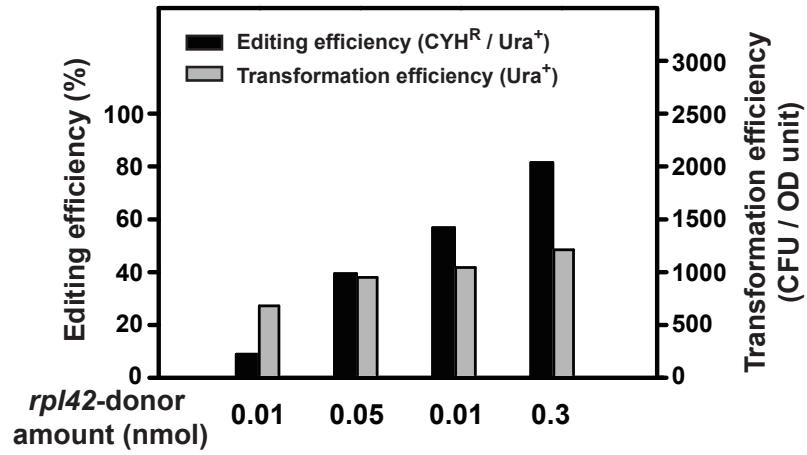

**Figure S4. The effects of different amounts of donor DNA on *rpl42-P56Q* knock-in when using the split-*ura4* system.**

Donor DNA was supplied as two 90-nt complementary oligos. 30 ng of the gapped plasmid, 200 ng of the *rpl42-P56Q* sgRNA insert, and the indicated amount of each oligo were used. The data are results of a representative experiment.
