# Supplementary material
Source: publisher figshare collection journal article supplement (https://gsajournals.figshare.com/articles/dataset/_/6133217)
Supplement: Supplementary file 6 [file 1]

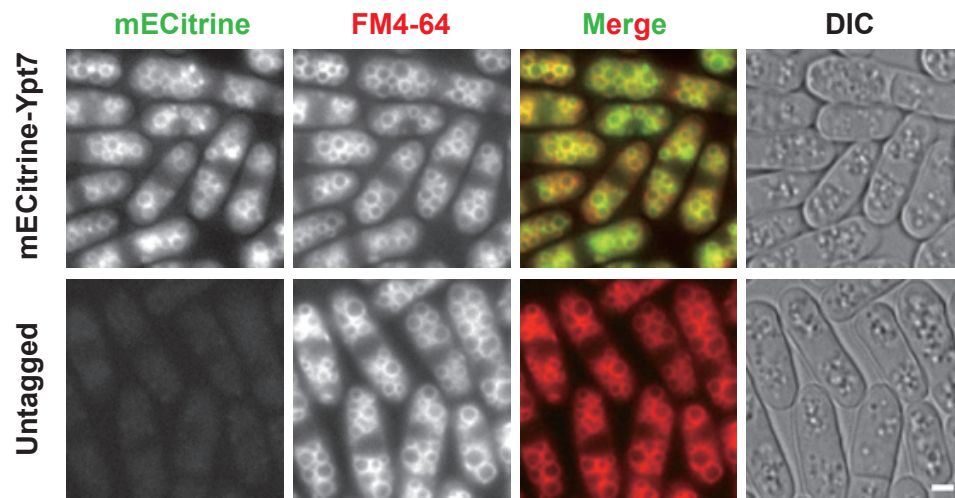

**Figure S7. mECitrine-Ypt7 strains generated using the split-*ura4* system showed the expected localization of mECitrine fluorescence on the vacuole membrane.**

mECitrine-Ypt7 was visualized by live cell fluorescence imaging. The parental strain LD260 was used as the untagged control. Vacuole membrane was stained by the vital dye FM4-64.
