# Supplementary material
Source: publisher figshare collection journal article supplement (https://gsajournals.figshare.com/articles/dataset/_/6133217)
Supplement: Supplementary file 7 [file 1]

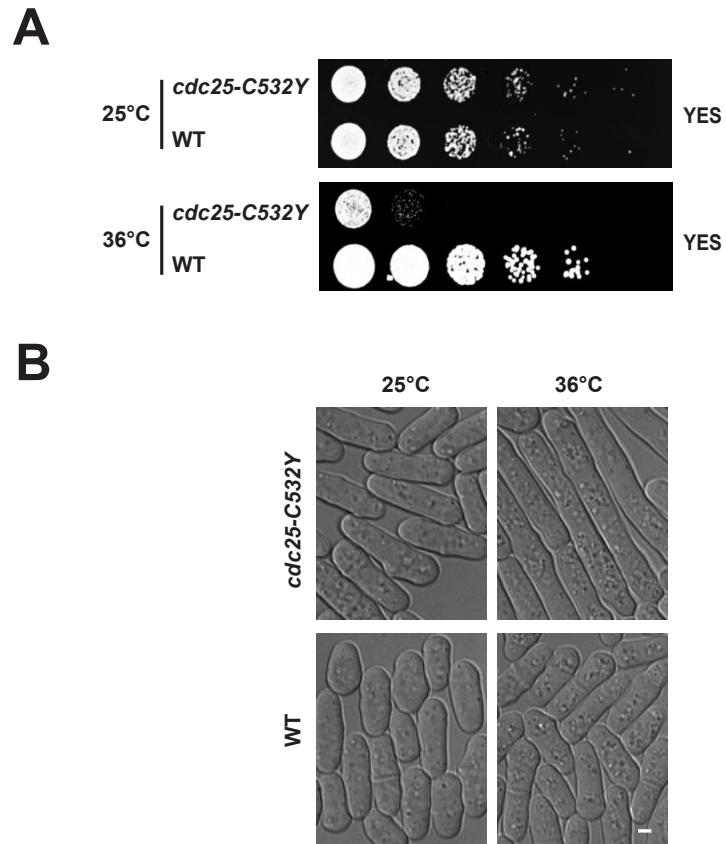

**Figure S6. *cdc25-C532Y* mutants generated using the split-*ura4* system behaved as expected.**

A. A *cdc25-C532Y* mutant obtained by Cas9-mediated knock-in exhibited the expected temperature-sensitive phenotype.

B. A *cdc25-C532Y* mutant obtained by Cas9-mediated knock-in exhibited the expected cell elongation phenotype upon shifting to the restrictive temperature.
