# Supplementary material
Source: publisher figshare collection journal article supplement (https://gsajournals.figshare.com/articles/dataset/_/6133217)
Supplement: Supplementary file 8 [file 1]

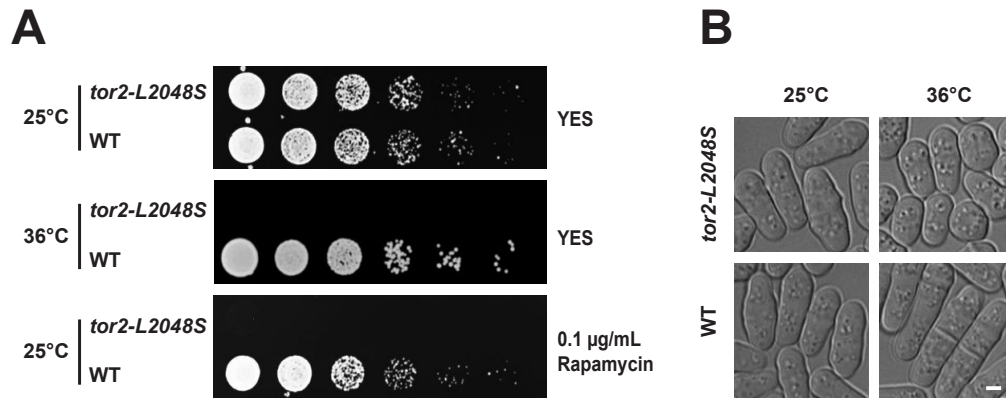

**Figure S5. *tor2-L2048S* mutants generated using the split-*ura4* system behaved as expected.**

A. A *tor2-L2048S* mutant obtained by Cas9-mediated knock-in exhibited the expected temperature-sensitive phenotype and rapamycin-sensitive phenotype.

B. A *tor2-L2048S* mutant obtained by Cas9-mediated knock-in exhibited the expected short-cell phenotype upon shifting to the restrictive temperature.
