# Supplementary material
Source: publisher figshare collection journal article supplement (https://gsajournals.figshare.com/articles/dataset/_/6133217)
Supplement: Supplementary file 9 [file 1]

**A**

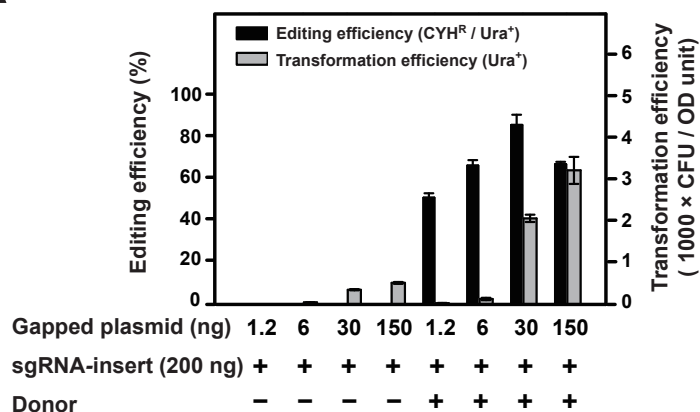

**B**

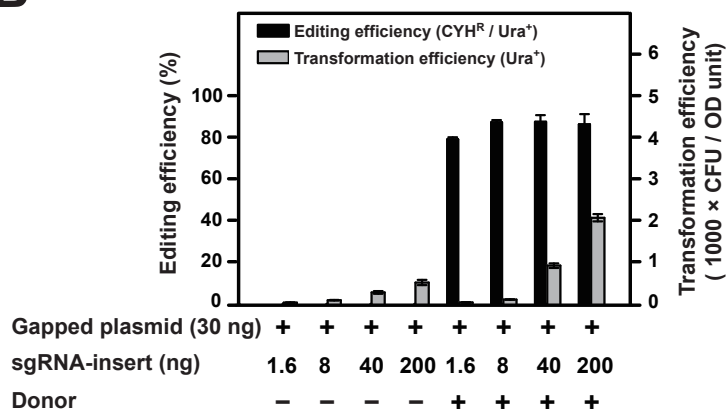

**Figure S2. The effects of different amounts of the gapped plasmid and the sgRNA insert on *rpl42-P56Q* knock-in when using the split-*ura4* system.**

A. Bar graph depicting the editing efficiencies and transformation efficiencies when varying amounts of the gapped plasmid were used. 200 ng of the *rpl42-P56Q* sgRNA insert and 0.3 nmol each of the two complementary 90-nt donor oligos were used as indicated.

Bar graph depicting the editing efficiencies and transformation efficiencies when varying amounts of the *rpl42-P56Q* sgRNA insert were used. 30 ng of the gapped plasmid and 0.3 nmol each of the two complementary 90-nt donor oligos were used as indicated. Error bars represent the standard deviation from at least three biological replicates.
