# Supplementary material
Source: publisher figshare collection journal article supplement (https://gsajournals.figshare.com/articles/dataset/_/6133217)
Supplement: Supplementary file 10 [file 1]

**Table S3. PCR and Sanger sequencing analysis of Ura<sup>+</sup> transformants obtained in the temperature-sensitive (ts) mutation knock-in experiments.**

| sgRNA                | Phenotype | Mutations                                                                         |
|----------------------|-----------|-----------------------------------------------------------------------------------|
| <i>tor2</i> -sgRNA1  | ts        | C6111A / <b>G6129A</b> / <u>T6143C</u> (3/5); <b>G6129A</b> / <u>T6143C</u> (2/5) |
|                      | Not ts    | C6111A / <b>G6129A</b> (3/11); <b>G6129A</b> (8/11)                               |
| <i>tor2</i> -sgRNA2  | ts        | <b>C6111A</b> / G6129A / <u>T6143C</u> (6/6)                                      |
|                      | Not ts    | <b>C6111A</b> / G6129A (1/8); <b>C6111A</b> (6/8); WT (1/8)                       |
| <i>cdc25</i> -sgRNA1 | ts        | C1581T / <b>C1590T</b> / <u>G1595A</u> (8/8);                                     |
|                      | Not ts    | WT (8/8)                                                                          |
| <i>cdc25</i> -sgRNA2 | ts        | <b>C1581T</b> / C1590T / <u>G1595A</u> (1/2); C1590T / <u>G1595A</u> (1/2)        |
|                      | Not ts    | WT (8/13); <b>C1581T</b> / C1590T (3/13); <b>C1581T</b> (2/13)                    |

Intended temperature-sensitive (ts) mutations are indicated by underline. PAM-disrupting silent mutations are indicated by bold letters.
